# Supplementary material for: Coordination of bacterial cell wall and outer membrane biosynthesis
Source: Springer Nature journal article supplement (doi:10.1038/s41586-023-05750-0), 2023-03-01
Supplement: MOESM1 [file 41586_2023_5750_MOESM1_ESM.pdf]

---

## Supplementary information

---

# Coordination of bacterial cell wall and outer membrane biosynthesis

---

In the format provided by the  
authors and unedited

## SUPPLEMENTARY METHODS

### Plasmid construction

**pKH3 [ $\Delta$ ftsH *sacB* *genf*]** – The upstream and downstream flanking regions of the *ftsH* locus were amplified from PAO1 gDNA using primers K5/K6 and K7/K8. The resulting fragments were ligated using Gibson assembly and subsequently inserted into the EcoRI/XbaI sites of pEXG2.

**pKH4 [ $\Omega$ 6-*his*-*lpxC* *sacB* *genf*]** – Upstream and downstream regions flanking the 5' end of *lpxC* were amplified from PAO1 gDNA using primers K9/K10 and K11/K12. Primer K10 encoded the introduced 6-*his* tag. The resulting fragments were ligated using Gibson assembly and subsequently inserted into the EcoRI/XbaI sites of pEXG2.

**pKH19 [*P*<sub>ara</sub>-6-*his*<sup>*Pa*</sup>-*lpxC* *amp*]** – The <sup>*Pa*</sup>*lpxC* locus was amplified from *P. aeruginosa* PAO1 gDNA using primers K27/K15 and subsequently ligated into the EcoRI/HindIII sites of pHerd20T.

**pKH20 [*P*<sub>ara</sub>-6-*his*<sup>*Ec*</sup>-*lpxC* *amp*]** – The <sup>*Ec*</sup>*lpxC* locus was amplified from *E. coli* MG1655 gDNA using primers K24/K25 and subsequently ligated into the EcoRI/HindIII sites of pHerd20T.

**pKH23 [*P*<sub>ara</sub>-<sup>*Pa*</sup>*lpxC* *amp*]** – The <sup>*Pa*</sup>*lpxC* locus was amplified from PAO1 gDNA using primers K54/K55 and subsequently ligated into the KpnI/SphI sites of pHerd20T.

**pKH24 [*P*<sub>ara</sub>-<sup>*Ec*</sup>*lpxC* *amp*]** – The <sup>*Ec*</sup>*lpxC* locus was excised from the XbaI/HindIII sites of pPR111 and subsequently ligated into the XbaI/HindIII sites of pHerd20T.

**pKH37 [*P*<sub>lac</sub>-<sup>*Pa*</sup>*murA*(WT) *genf*]** – The <sup>*Pa*</sup>*murA* open reading frame along with the 17 base pairs immediately upstream was synthesized by Genscript and inserted into the SacI and XbaI sites of pLSM11.

**pKH38 [*P*<sub>lac</sub>-<sup>*Pa*</sup>*murA*(C117S) *genf*]** – pKH37 was used as a template for site directed mutagenesis performed by Genscript. Specifically, the cysteine at codon 117 (TGC in WT) was mutated to a serine (AGC).

**pKH39 [ $\Delta$ PA4701 *sacB* *genf*]** – The upstream and downstream flanking regions of the PA4701 locus were amplified from PAO1 gDNA using primers K78/79 and K80/K81. The resulting fragments were ligated using Gibson assembly and subsequently inserted into the HindIII/BamHI sites of pEXG2.

**pKH58 [*P*<sub>ara</sub>-<sup>*Pa*</sup>*murA* *amp*]** – The <sup>*Pa*</sup>*murA* locus was amplified from PAO1 gDNA using primers K98/K112 and subsequently ligated into the XmaI/SphI sites of pHerd20T.

**pKH69 [*P*<sub>lac</sub>-FLAG-<sup>*Pa*</sup>*murA*(WT) *amp*]** – The <sup>*Pa*</sup>*murA* locus was amplified from PAO1 gDNA using primers K148/K149 and subsequently ligated into the XmaI/HindIII sites of pPSV38.

**pKH86 [ $\Delta$ *murA* *sacB* *genf*]** – The upstream and downstream flanking regions of the *murA* locus were amplified from PAO1 gDNA using primers K166/K167 and K168/K169. The resulting fragments were ligated using Gibson assembly and subsequently inserted into the EcoRI/XbaI sites of pEXG2.

**pKH87 [ $\Delta$ *murB* *sacB* *genf*]** – The upstream and downstream flanking regions of the *murB* locus were amplified from PAO1 gDNA using primers K170/K171 and K172/K173. The resulting fragments were ligated using Gibson assembly and subsequently inserted into the EcoRI/XbaI sites of pEXG2.

**pKH88 [*Tn7*::*P*<sub>toplacuv5</sub>-*murA* *genf*]** – The <sup>*Pa*</sup>*murA* locus was amplified from PAO1 gDNA using primers K174/K112 and subsequently ligated into the BamHI/SphI sites of pKHT105.

**pKH90 [*P*<sub>T7</sub>-*his*-SUMO-FLAG-<sup>*Pa*</sup>*lpxC* *amp*]** – The <sup>*Pa*</sup>*lpxC* locus was amplified from PAO1 gDNA using primers K179/K180. pAM205, encoding His-SUMO-FLAG-<sup>*Taq*</sup>*rodA* was linearized by amplification with primers K177/K178 so as to exclude the <sup>*Taq*</sup>*rodA* open reading frame. The two resulting fragments were ligated using Gibson assembly.

**pKH97 [*P*<sub>T7</sub>-*his*-<sup>*Pa*</sup>*murA* *kan*]** – The <sup>*Pa*</sup>*murA* locus was amplified from PAO1 gDNA using primers K193/K194. pET28a was linearized by amplification with primers K183/K184 and the two resulting fragments were ligated using Gibson assembly.

**pKH100 [*P<sub>lac</sub>*-FLAG-*P<sub>a</sub>murA*(C117S) *gent*]** – The upstream and downstream portions of *P<sub>a</sub>murA* were amplified from PAO1 gDNA using primers K148/K108 and K109/K149. K108 and K109 encoded the C117S substitution. The resulting fragments were ligated using Gibson assembly and subsequently ligated into the XmaI/HindIII sites of pPSV38.

**pKH103 [*P<sub>TT</sub>*-his-*P<sub>a</sub>murA*(C117S) *kan*]** – The upstream and downstream portions of *P<sub>a</sub>murA* were amplified from PAO1 gDNA using primers K193/K108 and K109/K194. K108 and K109 encoded the C117S substitution. pET28a was linearized by amplification with primers K183/K184 and the three resulting fragments were ligated using Gibson assembly.

**pKH155 [*Tn7*::*P<sub>toplacdn1</sub>*-*murB* *gent*]** – The *P<sub>a</sub>murB* locus was amplified from PAO1 gDNA using primers K175/K176 and subsequently ligated into the BamHI/SphI sites of pKHT104.

**pKH156 [*P<sub>TT</sub>*-his-SUMO-FLAG-*E<sub>c</sub>lpxC* *amp*]** – The *E<sub>c</sub>lpxC* locus was amplified from *E. coli* MG1655 gDNA using primers K202/K203. pAM205, encoding His-SUMO-FLAG-*TaqrodA* was linearized by amplification with primers K177/K178 so as to exclude the *TaqrodA* open reading frame. The two resulting fragments were ligated using Gibson assembly.

**pKH157 [*P<sub>TT</sub>*-his-*E<sub>c</sub>murA* *kan*]** – The *E<sub>c</sub>murA* locus was amplified from *E. coli* MG1655 gDNA using primers K204/K205. pET28a was linearized by amplification with primers K183/K184 and the two resulting fragments were ligated using Gibson assembly.

**pKH161 [*Ω<sup>P<sub>a</sub>murA</sup>*(C117S) *sacB* *gent*]** – Upstream and downstream regions flanking *P<sub>a</sub>murA* residue 117 were amplified from PAO1 gDNA using primers K166/K108 and K109/K218. Primers K108/K109 encoded the C117S substitution. The resulting fragments were ligated using Gibson assembly and subsequently inserted into the EcoRI/BamHI sites of pEXG2.

**pKH189 [*P<sub>TT</sub>*-his-SUMO-FLAG-*A<sub>ba</sub>lpxC* *amp*]** – The *A<sub>ba</sub>lpxC* locus was amplified from *A. baumannii* ATCC 17978 gDNA using primers K223/K224. pAM205, encoding His-SUMO-FLAG-*TaqrodA* was linearized by amplification with primers K177/K178 so as to exclude the *TaqrodA* open reading frame. The two resulting fragments were ligated using Gibson assembly.

**pKH194 [*P<sub>TT</sub>*-his-*A<sub>ba</sub>murA* *kan*]** – The *A<sub>ba</sub>murA* locus was amplified from *A. baumannii* ATCC 17978 gDNA using primers K225/K226. pET28a was linearized by amplification with primers K183/K184 and the two resulting fragments were ligated using Gibson assembly. A stop codon was subsequently introduced into the *AbamurA* open reading frame using the QuikChange lightning kit (Agilent 210514) with primers K238/K239.

**pKH215 [*P<sub>TT</sub>*-his-*P<sub>a</sub>murA*(K22R) *kan*]** – The *His-P<sub>a</sub>murA* open reading frame in pKH97 was mutagenized using the QuikChange lightning kit (Agilent 210514) with primers K284/K285.

**pKH216 [*P<sub>TT</sub>*-his-*P<sub>a</sub>murA*(C117R) *kan*]** – The *His-P<sub>a</sub>murA* open reading frame in pKH97 was mutagenized using the QuikChange lightning kit (Agilent 210514) with primers K286/K287.

**pKH217 [*P<sub>TT</sub>*-his-*P<sub>a</sub>murA*(I119F) *kan*]** – The *His-P<sub>a</sub>murA* open reading frame in pKH97 was mutagenized using the QuikChange lightning kit (Agilent 210514) with primers K288/K289.

**pKH218 [*P<sub>TT</sub>*-his-*P<sub>a</sub>murA*(D308N) *kan*]** – The *His-P<sub>a</sub>murA* open reading frame in pKH97 was mutagenized using the QuikChange lightning kit (Agilent 210514) with primers K290/K291.

**pKH219 [*P<sub>TT</sub>*-his-*P<sub>a</sub>murA*(Q310R) *kan*]** – The *His-P<sub>a</sub>murA* open reading frame in pKH97 was mutagenized using the QuikChange lightning kit (Agilent 210514) with primers K292/K293.

**pKH220 [*P<sub>TT</sub>*-his-*P<sub>a</sub>murA*(R334C) *kan*]** – The *His-P<sub>a</sub>murA* open reading frame in pKH97 was mutagenized using the QuikChange lightning kit (Agilent 210514) with primers K294/K295.

**pKH221 [*P<sub>TT</sub>*-his-*P<sub>a</sub>murA*(R334S) *kan*]** – The *His-P<sub>a</sub>murA* open reading frame in pKH97 was mutagenized using the QuikChange lightning kit (Agilent 210514) with primers K296/K297.

**pKH247 [*P<sub>TT</sub>*-his-*P<sub>a</sub>murA*(G58D) *kan*]** – The *His-P<sub>a</sub>murA* open reading frame in pKH97 was mutagenized using the QuikChange lightning kit (Agilent 210514) with primers K379/K380.

**pKH248 [*P<sub>TT</sub>*-his-*P<sub>a</sub>murA*(E406K) *kan*]** – The *His-P<sub>a</sub>murA* open reading frame in pKH97 was mutagenized using the QuikChange lightning kit (Agilent 210514) with primers K381/K382.

**pKH251 [*P<sub>lac</sub>*-*P<sub>a</sub>murA*(C117S,G58D) *gent*]** – The *P<sub>a</sub>murA*(C117S) open reading frame in pKH38 was mutagenized using the QuikChange lightning kit (Agilent 210514) with primers K379/K380.

**pKH252 [*P<sub>lac</sub>*-*Pa*murA(C117S,E406K) gent]** – The *Pa*murA(C117S) open reading frame in pKH38 was mutagenized using the QuikChange lightning kit (Agilent 210514) with primers K381/K382.

**pKH257 [*P<sub>lac</sub>*-FLAG-*Pa*murA(C117S,G58D) gent]** – The FLAG-*Pa*murA(C117S) open reading frame in pKH100 was mutagenized using the QuikChange lightning kit (Agilent 210514) with primers K379/K380.

**pKH258 [*P<sub>lac</sub>*-FLAG-*Pa*murA(C117S,E406K) gent]** – The FLAG-*Pa*murA(C117S) open reading frame in pKH100 was mutagenized using the QuikChange lightning kit (Agilent 210514) with primers K381/K382.

**pKH261 [*P<sub>TT</sub>*-his-SUMO-FLAG-*Mku*lpxC amp]** –A DNA fragment containing the *Magnetospirillum kuznetsovii* lpxC open reading frame codon optimized for expression in *E. coli* and flanked by regions homologous to primers K177 and K178 was synthesized as a gBlock by IDT. The resulting fragment was ligated into pKH90 linearized by PCR with primers K177 and K178. The gBlock sequence can be found in table S5.

**pKH262 [*P<sub>TT</sub>*-his-SUMO-FLAG-*Xba*lpxC amp]** –A DNA fragment containing the *Magnetospirillum kuznetsovii* (TaxID 2053833) lpxC open reading frame codon optimized for expression in *E. coli* and flanked by regions homologous to primers K177 and K178 was synthesized as a gBlock by IDT. The resulting fragment was ligated into pKH90 linearized by PCR with primers K177 and K178. The gBlock sequence can be found in table S5.

**pKH264 [*P<sub>TT</sub>*-his-*Mku*murA kan]** –A DNA fragment containing the *Magnetospirillum kuznetsovii* (TaxID 2053833) murA open reading frame codon optimized for expression in *E. coli*, driven by an optimized ribosome binding site, and flanked by regions homologous to primers K183 and K184 was synthesized as a gBlock by IDT. The resulting fragment was ligated into pKH97 linearized by PCR with primers K183 and K184. The gBlock sequence can be found in table S5.

**pKH265 [*P<sub>TT</sub>*-his-*Xba*murA kan]** –A DNA fragment containing the *Xanthomonadales bacterium* (TaxID 2006849) murA open reading frame codon optimized for expression in *E. coli*, driven by an optimized ribosome binding site, and flanked by regions homologous to primers K183 and K184 was synthesized as a gBlock by IDT. The resulting fragment was ligated into pKH97 linearized by PCR with primers K183 and K184. The gBlock sequence can be found in table S5.

**pKH267 [*P<sub>TT</sub>*-his-SUMO-FLAG-*Lpn*lpxC amp]** –A DNA fragment containing the *Legionella pneumophila* subsp. *Pneumophila* ATCC 33152 lpxC open reading frame codon optimized for expression in *E. coli* and flanked by regions homologous to primers K177 and K178 was synthesized as a gBlock by IDT. The resulting fragment was ligated into pKH90 linearized by PCR with primers K177 and K178. The gBlock sequence can be found in table S5.

**pKH268 [*P<sub>TT</sub>*-his-*Lpn*murA kan]** – A DNA fragment containing the *Legionella pneumophila* subsp. *Pneumophila* ATCC 33152 murA open reading frame codon optimized for expression in *E. coli*, driven by an optimized ribosome binding site, and flanked by regions homologous to primers K183 and K184 was synthesized as a gBlock by IDT. The resulting fragment was ligated into pKH97 linearized by PCR with primers K183 and K184. The gBlock sequence can be found in table S5.

**pKH269 [*P<sub>ara</sub>*-*Pa*murA(G58D) amp]** – The *Pa*murA open reading frame in pKH58 was mutagenized using the QuikChange lightning kit (Agilent 210514) with primers K379/K380.

### **Strain construction**

***P. aeruginosa* transformation** – 1 mL of *P. aeruginosa* cultures grown overnight at either 30°C or 37°C were pelleted by centrifugation at 9,391 x g and washed 4 times in an equal volume of 300 mM sucrose. Cells were resuspended in 50 µL of 300 mM sucrose, mixed with approximately 50 ng of DNA, and subsequently electroporated in 2 mm cuvettes (Genesee Scientific 40-101) at 2.5 kV using a Bio-Rad MicroPulser. Unless stated otherwise, cells were recovered in 1 mL LB rotating end-over-end at 30°C for 1 hr and transformants were selected by plating the cells onto LB agar supplemented with the appropriate antibiotic.

**Allelic replacement** – *E. coli* SM10 strains harboring pEXG2 derivatives were used as donors in conjugations in which *P. aeruginosa* was a recipient. Transconjugants were selected by growth on Vogel-Bonner minimal medium (3 g trisodium citrate, 2 g citric acid, 10 g K<sub>2</sub>HPO<sub>4</sub>, 3.5 g NaNH<sub>4</sub>PO<sub>4</sub>•4H<sub>2</sub>O, and 15 g agar per 1 L) supplemented with 30 µg/mL gentamycin. The resulting transconjugants were allowed to excise the plasmid by growth in LB at 37°C and *sacB* isolates were obtained by selection on LB agar plates supplemented with 5% (w/v) sucrose. The presence of the desired mutation was then validated as described below.

**6-*his*-*P<sub>a</sub>*lpxC** – pKH4 was introduced into *P. aeruginosa* PAO1 by conjugation and excised as described above to create PA1018. The presence of the 6-*his*-*P<sub>a</sub>*lpxC mutation was verified by PCR amplification of the *lpxC* locus with primers K9/K12 and subsequent sanger sequencing with primer K17. pKH3 was introduced into PA1018 and excised as described above to create PA1037. The presence of  $\Delta$ *ftsH* was verified by PCR with primers K5/K21.

**$\Delta$ PA4701** – pKH39 was introduced into *P. aeruginosa* PAO1 by conjugation and excised as described above to create PA4701. The presence of  $\Delta$ PA4701 was verified by PCR with primers K81/K100.

**$\Delta$ *P<sub>a</sub>*murA** – pKH88 was co-transformed with pTNS2 into *P. aeruginosa* PAO1. Gentamycin-resistant colonies were selected and integration into attTn7 was confirmed by PCR with primers 67/68. pFlp2 was introduced into the resulting strain and the *gent<sup>R</sup>* cassette was excised, resulting in PA1117. pKH86 was introduced into PA1117 by conjugation and excised in the presence of 1 mM IPTG as described above to create PA1118. The presence of  $\Delta$ *P<sub>a</sub>*murA was verified by PCR with primers K187/K169. PA1118 was propagated in the presence of 1 mM IPTG.

**$\Delta$ *P<sub>a</sub>*murB** – pKH155 was co-transformed with pTNS2 into *P. aeruginosa* PAO1. Gentamycin-resistant colonies were selected and integration into attTn7 was confirmed by PCR with primers 67/68. pFlp2 was introduced into the resulting strain, the *gent<sup>R</sup>* cassette was excised, and pKH87 was introduced by conjugation and subsequently excised in the presence of 1 mM IPTG as described above to create PA1135. The presence of  $\Delta$ *P<sub>a</sub>*murB was verified by PCR with primers K188/K173. PA1135 was propagated in the presence of 1 mM IPTG.

***P<sub>a</sub>*murA(C117S)** – pKH161 was introduced by conjugation into PA1117 and subsequently excised in the presence of 1 mM IPTG as described above to create PA1162. The presence of *P<sub>a</sub>*murA(C117S) at the native site was verified by amplification of the *murA* locus with primers K187/K106 and subsequent sanger sequencing with primer K187. We found that the *P<sub>a</sub>*murA(C117S) allele was not stably maintained in LB at 37°C and reverted to the *P<sub>a</sub>*murA(WT) allele with high frequency under those conditions. To mitigate this instability, PA1162 and its derivatives were propagated at 30°C in M9 media<sup>1</sup> supplemented with 1 mM IPTG.

## **Protein Purification**

**His-MurA** – 10 mL of an overnight culture of *E. coli* strain ER2566 harboring pKH97, pKH103, pKH157, pKH194, pKH264, pKH265, or pKH268 was subcultured into 1 L Terrific broth (24 g yeast extract, 12 g tryptone, 0.4% glycerol, 2.31 g KH<sub>2</sub>PO<sub>4</sub> and 12.5 g K<sub>2</sub>HPO<sub>4</sub> per 1 L) and allowed to grow at 37°C until reaching an OD<sub>600</sub> of 0.5-0.6. Expression of 6-*his*-MurA was then induced by the addition of IPTG to 1 mM and the culture was grown at 20°C for approximately 20 hours. Cells were pelleted by centrifugation at 12,000 xg for 10 min, the pellet was resuspended in 45 mL Lysis buffer A (25 mM Tris pH 8.0, 100 mM NaCl, 5 mM imidazole) and cells were subsequently lysed by 2 passages through a continuous flow cell disruptor (Constant Solutions, Ltd) at 25,000 psi. The extract was clarified by two successive centrifugations at 32,000 rpm for 20 min at 4°C using a 45 Ti rotor (Beckman Coulter) and subsequently bound to Ni-NTA agarose resin (Qiagen 30230). The resin was washed with 10 column volumes of wash buffer A (25 mM Tris pH 8.0, 100 mM NaCl, 25 mM imidazole) and protein was eluted in four 5 mL fractions of lysis buffer containing increasing concentrations of imidazole: 50 mM, 100 mM, 250 mM, and 500 mM. One fraction containing the highest concentration of 6-*his*-MurA as assayed by SDS-PAGE and subsequent Coomassie staining was dialyzed overnight at 4°C in 1L MurA storage buffer A (25

mM Tris pH 8.0, 150 mM NaCl, 0.5 mM DTT, 10% glycerol) using SnakeSkin dialysis tubing (Thermo 68700). Dialyzed products were flash frozen in liquid nitrogen and stored at -80°C. The concentration of 6-His-MurA orthologs were determined using Quick Start Bradford 1X Dye Reagent (Bio-Rad 5000205) and a standard curve of BSA. Purified proteins were resolved on by SDS-PAGE on a 15% polyacrylamide and protein was detected with Coomassie staining (**Extended Data 5a**)

**FLAG-LpxC** – 10 mL of an overnight culture of *E. coli* strain ER2566 harboring pAM174 as well as pKH90, pKH156, pKH189, pKH261, pKH262, or pKH267 was subcultured into 1 L Terrific broth (24 g yeast extract, 12 g tryptone, 0.4% glycerol, 2.31 g KH<sub>2</sub>PO<sub>4</sub> and 12.5 g K<sub>2</sub>HPO<sub>4</sub> per 1 L) and allowed to grow at 37°C until reaching an OD<sub>600</sub> of 0.5-0.6. Expression of FLAG-LpxC and Ulp1 were simultaneously induced by the addition of 1 mM IPTG and 0.05% arabinose, and the culture was grown at 30°C for an additional 4 hours. Cells were pelleted by centrifugation at 12,000 xg for 10 min, the pellet was resuspended in 45 mL Lysis buffer B (20 mM HEPES pH 7.5, 500 mM NaCl, 20 mM MgCl<sub>2</sub>, 0.5 mM DTT) and cells were subsequently lysed by 2 passages through a continuous flow cell disruptor (Constant Solutions, Ltd) at 25,000 psi. The extract was clarified by two successive centrifugations at 32,000 rpm for 20 min at 4°C using a 45 Ti rotor (Beckman Coulter), CaCl<sub>2</sub> was added to 2 mM, and supernatant was bound to a homemade M1  $\alpha$ -Flag antibody resin. The resin was washed with 25 column volumes of wash buffer B (20 mM HEPES pH 7.5, 500 mM NaCl, 2 mM CaCl<sub>2</sub>) and protein was eluted with 5 column volumes of elution buffer B (20 mM HEPES pH 7.0, 500 mM NaCl, 5 mM EDTA pH 8.0, 100  $\mu$ g/mL FLAG peptide). The elution was concentrated by centrifugation at 4°C using 10 kDa molecular weight cutoff centrifugal filters (Amicon UFC801024). The concentrated protein was next subjected to size exclusion chromatography using an ActaPure system equipped with a Superdex<sup>TM</sup> 75 10/300 GL column equilibrated with SEC buffer (20 mM HEPES, 500 mM NaCl). LpxC peak fractions were pooled and dialyzed overnight at 4°C in 1L LpxC storage buffer (25 mM Tris pH 8.0, 150 mM NaCl, 2 mM DTT, 10% glycerol) using SnakeSkin dialysis tubing (Thermo 68700). Dialyzed products were flash frozen in liquid nitrogen and stored at -80°C. The concentration of Flag-LpxC orthologs were determined using Quick Start Bradford 1X Dye Reagent (Bio-Rad 5000205) and a standard curve of BSA. Purified proteins were resolved on by SDS-PAGE on a 15% polyacrylamide and protein was detected with Coomassie staining (**Extended Data 5a**)

**Supplementary Table 1. Proteins that co-purify with <sup>Pa</sup>LpxC identified by mass spectrometry.**

| Gene Symbol | PAO1 (WT)           |                    |                            | PA1018 (6-his- <sup>Pa</sup> LpxC) |       |               | PA1009 (6-his- <sup>Ec</sup> LpxC) |       |               |
|-------------|---------------------|--------------------|----------------------------|------------------------------------|-------|---------------|------------------------------------|-------|---------------|
|             | 150 mM NaCl         |                    | 300 mM NaCl                | 150 mM NaCl                        |       | 300 mM NaCl   | 150 mM NaCl                        |       | 300 mM NaCl   |
|             | Unique <sup>a</sup> | Total <sup>b</sup> | Sum Intensity <sup>c</sup> | Unique                             | Total | Sum Intensity | Unique                             | Total | Sum Intensity |
| <i>lpxC</i> | 1                   | 3.8E+              |                            | 1                                  | 3.7E+ |               | 3                                  | 3.4E+ |               |
|             | 6                   | 0                  | 06                         | 7                                  | 1     | 06            | 9                                  | 3     | 08            |
|             |                     |                    | 2.6E+                      |                                    |       | 1.9E+         |                                    |       | 9.0E+         |
| <i>murA</i> | 2                   | 2                  | 05                         | 1                                  | 1     | 04            | 2                                  | 5     | 05            |
| <i>PA47</i> |                     |                    |                            |                                    |       | 5.0E+         |                                    |       | 2.4E+         |
| <i>01</i>   | 0                   | 0                  | NF                         | 0                                  | 0     | NF            | 0                                  | 0     | NF            |

<sup>a</sup>Unique indicates the number of unique peptides identified.

<sup>b</sup>Total indicates the total number of peptides identified.

<sup>c</sup>NF = Not Found



**Supplementary Table 2 – Plasmids used in this study**

| Plasmid  | Genotype                                                                                   | Reference or source     |
|----------|--------------------------------------------------------------------------------------------|-------------------------|
| pAM174   | <i>P<sub>ara</sub>-6-his-Ulp1 cat</i>                                                      | 2                       |
| pAM205   | <i>P<sub>T7</sub>-his-sumo-flag-<sup>Taq</sup>rodA amp</i>                                 | Kruse Lab, Boston, MA   |
| pET28a   | <i>P<sub>T7</sub> kan</i>                                                                  | Novagen                 |
| pEXG2    | <i>sacB gent</i>                                                                           | 3                       |
| pFLP2    | <i>Flp recombinase amp</i>                                                                 | 4                       |
| pHerd20T | <i>P<sub>ara</sub> amp</i>                                                                 | 5                       |
| pKHT104  | <i>Tn7::P<sub>toplacdn1</sub> gent</i>                                                     | Dove Lab, Cambridge, MA |
| pKHT105  | <i>Tn7::P<sub>toplacuv5</sub> gent</i>                                                     | Dove Lab, Cambridge, MA |
| pLSM11   | <i>P<sub>lac</sub>-ftsL gent</i>                                                           | 6                       |
| pPR111   | <i>P<sub>lac</sub>-<sup>Ec</sup>lpxC cat</i>                                               | 7                       |
| pPSV38   | <i>P<sub>lac</sub> gent</i>                                                                | 8                       |
| pTNS2    | <i>tnsABC+D amp</i>                                                                        | 9                       |
| pKH3     | <i>ΩΔftsH sacB gent</i>                                                                    | Genscript               |
| pKH4     | <i>Ω6-his-<sup>Pa</sup>lpxC sacB gent</i>                                                  |                         |
| pKH19    | <i>P<sub>ara</sub>-6-his-<sup>Pa</sup>lpxC amp</i>                                         |                         |
| pKH20    | <i>P<sub>ara</sub>-6-his-<sup>Ec</sup>lpxC amp</i>                                         |                         |
| pKH23    | <i>P<sub>ara</sub>-<sup>Pa</sup>lpxC amp</i>                                               |                         |
| pKH24    | <i>P<sub>ara</sub>-<sup>Ec</sup>lpxC amp</i>                                               |                         |
| pKH37    | <i>P<sub>lac</sub>-<sup>Pa</sup>murA gent</i>                                              |                         |
| pKH37-2A | <i>P<sub>lac</sub>-<sup>Pa</sup>murA(K22R) gent</i>                                        |                         |
| pKH37-4C | <i>P<sub>lac</sub>-<sup>Pa</sup>murA(D49V) gent</i>                                        |                         |
| pKH37-1A | <i>P<sub>lac</sub>-<sup>Pa</sup>murA(G116S) gent</i>                                       |                         |
| pKH37-5R | <i>P<sub>lac</sub>-<sup>Pa</sup>murA(C117R) *silent mutation codon 298 CGT&gt;CGC gent</i> |                         |
| pKH37-5U | <i>P<sub>lac</sub>-<sup>Pa</sup>murA(C117S) gent</i>                                       |                         |
| pKH37-3D | <i>P<sub>lac</sub>-<sup>Pa</sup>murA(I119F) gent</i>                                       |                         |
| pKH37-1B | <i>P<sub>lac</sub>-<sup>Pa</sup>murA(L126P) gent</i>                                       |                         |
| pKH37-1C | <i>P<sub>lac</sub>-<sup>Pa</sup>murA(V166A) *silent mutation codon 283 ATC&gt;ATT gent</i> |                         |
| pKH37-1E | <i>P<sub>lac</sub>-<sup>Pa</sup>murA(E193G) gent</i>                                       |                         |
| pKH37-2B | <i>P<sub>lac</sub>-<sup>Pa</sup>murA(D234A) gent</i>                                       |                         |
| pKH37-4N | <i>P<sub>lac</sub>-<sup>Pa</sup>murA(I236T) gent</i>                                       |                         |
| pKH37-4L | <i>P<sub>lac</sub>-<sup>Pa</sup>murA(T240I) gent</i>                                       |                         |
| pKH37-5D | <i>P<sub>lac</sub>-<sup>Pa</sup>murA(D308G) gent</i>                                       |                         |
| pKH37-1D | <i>P<sub>lac</sub>-<sup>Pa</sup>murA(D308N) *silent mutation codon 218 ATC&gt;ATT gent</i> |                         |
| pKH37-5N | <i>P<sub>lac</sub>-<sup>Pa</sup>murA(Q310R) gent</i>                                       |                         |
| pKH37-5L | <i>P<sub>lac</sub>-<sup>Pa</sup>murA(E328G) gent</i>                                       |                         |
| pKH37-2J | <i>P<sub>lac</sub>-<sup>Pa</sup>murA(V330A) gent</i>                                       |                         |
| pKH37-2H | <i>P<sub>lac</sub>-<sup>Pa</sup>murA(F331L) gent</i>                                       |                         |
| pKH37-4J | <i>P<sub>lac</sub>-<sup>Pa</sup>murA(R334C) gent</i>                                       |                         |
| pKH37-1L | <i>P<sub>lac</sub>-<sup>Pa</sup>murA(R334S) gent</i>                                       |                         |
| pKH37-3G | <i>P<sub>lac</sub>-<sup>Pa</sup>murA(D372G) *silent mutation codon 83 GTC&gt;GTT gent</i>  |                         |
| pKH37-3C | <i>P<sub>lac</sub>-<sup>Pa</sup>murAA(375T) gent</i>                                       | Genscript               |
| pKH37-4I | <i>P<sub>lac</sub>-<sup>Pa</sup>murA(L379P) gent</i>                                       |                         |
| pKH38    | <i>P<sub>lac</sub>-<sup>Pa</sup>murA(C117S) gent</i>                                       |                         |
| pKH39    | <i>ΩΔPA4701 sacB gent</i>                                                                  |                         |
| pKH58    | <i>P<sub>ara</sub>-murA amp</i>                                                            |                         |
| pKH69    | <i>P<sub>lac</sub>-FLAG-<sup>Pa</sup>murA gent</i>                                         |                         |
| pKH86    | <i>ΩΔmurA sacB gent</i>                                                                    |                         |
| pKH87    | <i>ΩΔmurB sacB gent</i>                                                                    |                         |
| pKH88    | <i>Tn7::P<sub>toplacuv5</sub>-murA gent</i>                                                |                         |
| pKH90    | <i>P<sub>T7</sub>-6-his-SUMO-FLAG-<sup>Pa</sup>lpxC amp</i>                                |                         |
| pKH97    | <i>P<sub>T7</sub>-6-his-<sup>Pa</sup>murA kan</i>                                          |                         |
| pKH100   | <i>P<sub>lac</sub>-FLAG-<sup>Pa</sup>murA(C117S) gent</i>                                  |                         |
| pKH103   | <i>P<sub>T7</sub>-6-his-<sup>Pa</sup>murA(C117S) kan</i>                                   |                         |
| pKH155   | <i>Tn7::P<sub>toplacdn1</sub>-murB gent</i>                                                |                         |



|        |                                                                 |  |
|--------|-----------------------------------------------------------------|--|
| pKH156 | <i>P<sub>T7</sub>-6-his-SUMO-FLAG-<sup>Ec</sup>lpxC amp</i>     |  |
| pKH157 | <i>P<sub>T7</sub>-6-his-<sup>Ec</sup>murA kan</i>               |  |
| pKH161 | <i>Ω<sup>Pa</sup>murA(C117S) sacB gent</i>                      |  |
| pKH189 | <i>P<sub>T7</sub>-6-his-SUMO-FLAG-<sup>Aba</sup>lpxC amp</i>    |  |
| pKH194 | <i>P<sub>T7</sub>-6-his-<sup>Aba</sup>murA kan</i>              |  |
| pKH215 | <i>P<sub>T7</sub>-6-his-<sup>Pa</sup>murA(K22R) kan</i>         |  |
| pKH216 | <i>P<sub>T7</sub>-6-his-<sup>Pa</sup>murA(C117S) kan</i>        |  |
| pKH217 | <i>P<sub>T7</sub>-6-his-<sup>Pa</sup>murA(I119F) kan</i>        |  |
| pKH218 | <i>P<sub>T7</sub>-6-his-<sup>Pa</sup>murA(D308N) kan</i>        |  |
| pKH219 | <i>P<sub>T7</sub>-6-his-<sup>Pa</sup>murA(Q310R) kan</i>        |  |
| pKH220 | <i>P<sub>T7</sub>-6-his-<sup>Pa</sup>murA(R334C) kan</i>        |  |
| pKH221 | <i>P<sub>T7</sub>-6-his-<sup>Pa</sup>murA(R334S) kan</i>        |  |
| pKH247 | <i>P<sub>T7</sub>-6-his-<sup>Pa</sup>murA(G58D) kan</i>         |  |
| pKH248 | <i>P<sub>T7</sub>-6-his-<sup>Pa</sup>murA(E406K) kan</i>        |  |
| pKH251 | <i>P<sub>lac</sub>-<sup>Pa</sup>murA(C117S,G58D) gent</i>       |  |
| pKH252 | <i>P<sub>lac</sub>-<sup>Pa</sup>murA(C117S,E406K) gent</i>      |  |
| pKH257 | <i>P<sub>lac</sub>-FLAG-<sup>Pa</sup>murA(C117S,G58D) gent</i>  |  |
| pKH258 | <i>P<sub>lac</sub>-FLAG-<sup>Pa</sup>murA(C117S,E406K) gent</i> |  |
| pKH261 | <i>P<sub>T7</sub>-6-his-SUMO-FLAG-<sup>Mku</sup>lpxC amp</i>    |  |
| pKH262 | <i>P<sub>T7</sub>-6-his-SUMO-FLAG-<sup>Xba</sup>lpxC amp</i>    |  |
| pKH264 | <i>P<sub>T7</sub>-6-his-<sup>Mku</sup>murA kan</i>              |  |
| pKH265 | <i>P<sub>T7</sub>-6-his-<sup>Xba</sup>murA kan</i>              |  |
| pKH267 | <i>P<sub>T7</sub>-6-his-SUMO-FLAG-<sup>Lpn</sup>lpxC amp</i>    |  |
| pKH268 | <i>P<sub>T7</sub>-6-his-<sup>Lpn</sup>murA kan</i>              |  |
| pKH269 | <i>P<sub>ara</sub>-<sup>Pa</sup>murA<sup>G58D</sup> amp</i>     |  |

**Supplementary Table 3 - Strains used in this study**

| Strain name                  | Strain #            | Genotype <sup>a,b</sup>                                                                                                                     | Reference or Source  |
|------------------------------|---------------------|---------------------------------------------------------------------------------------------------------------------------------------------|----------------------|
| <i>E. coli</i> strains       |                     |                                                                                                                                             |                      |
| ER2566                       | -                   | lacZ::T7 gene1 fhuA2 lon ompT gal sulA11 mcr endA1 dcm                                                                                      | New England Biolabs  |
| XL1-red                      | -                   | endA1 gyrA96 thi-1 hsdR17 supE44 relA1 lac mutD5 mutS mutT Tn10 (Tetr) <sup>a</sup>                                                         | 10                   |
| <i>P. aeruginosa</i> strains |                     |                                                                                                                                             |                      |
| PAO1                         | -                   | <i>P. aeruginosa</i> Wild type                                                                                                              | Lory Lab, Boston, MA |
| PAO1/pPSV38                  | PA239               | [ <i>P</i> <sub>lac</sub> -empty gent]                                                                                                      |                      |
| PAO1/pKH19                   | PA1008              | [ <i>P</i> <sub>ara</sub> -6-his- <i>P</i> <sub>a</sub> lpxC amp]                                                                           |                      |
| PAO1/pKH20                   | PA1009              | [ <i>P</i> <sub>ara</sub> -6-his- <i>E</i> <sub>c</sub> lpxC amp]                                                                           |                      |
| PAO1/pHerd20T                | PA1010              | [ <i>P</i> <sub>ara</sub> -empty amp]                                                                                                       |                      |
| PA1018/pPSV38                | PA1013              | 6-his- <i>P</i> <sub>a</sub> lpxC [ <i>P</i> <sub>lac</sub> -empty gent]                                                                    |                      |
| PA1018                       | PA1018              | 6-his- <i>P</i> <sub>a</sub> lpxC                                                                                                           |                      |
| PAO1/pKH23                   | PA1020              | [ <i>P</i> <sub>ara</sub> - <i>P</i> <sub>a</sub> lpxC amp]                                                                                 |                      |
| PAO1/pKH24                   | PA1021              | [ <i>P</i> <sub>ara</sub> - <i>E</i> <sub>c</sub> lpxC amp]                                                                                 |                      |
| PAO1/pKH37                   | PA1035              | [ <i>P</i> <sub>lac</sub> - <i>P</i> <sub>a</sub> murA gent]                                                                                |                      |
| PAO1/pKH38                   | PA1036              | [ <i>P</i> <sub>lac</sub> - <i>P</i> <sub>a</sub> murA(C117S) gent]                                                                         |                      |
| PA1037                       | PA1037              | 6-his- <i>P</i> <sub>a</sub> lpxC ΔftsH                                                                                                     |                      |
| PAO1/pKH69                   | PA1068              | [ <i>P</i> <sub>lac</sub> -FLAG- <i>P</i> <sub>a</sub> murA gent]                                                                           |                      |
| PA1018/pKH69                 | PA1071              | 6-his- <i>P</i> <sub>a</sub> lpxC [ <i>P</i> <sub>lac</sub> -FLAG- <i>P</i> <sub>a</sub> murA gent]                                         |                      |
| PA1080                       | PA1080              | ΔPA4701                                                                                                                                     |                      |
| PA1117                       | PA1117              | attTn7:: <i>P</i> <sub>TOPLACUV5</sub> - <i>P</i> <sub>a</sub> murA                                                                         |                      |
| PA1118                       | PA1118              | Δ <i>P</i> <sub>a</sub> murA attTn7:: <i>P</i> <sub>TOPLACUV5</sub> - <i>P</i> <sub>a</sub> murA                                            |                      |
| PA1018/pKH100                | PA1121              | 6-his- <i>P</i> <sub>a</sub> lpxC [ <i>P</i> <sub>lac</sub> -FLAG- <i>P</i> <sub>a</sub> murA(C117S) gent]                                  |                      |
| PA1135                       | PA1135              | ΔmurB attTn7:: <i>P</i> <sub>TOPLACDN1</sub> -murB                                                                                          |                      |
| PAO1/pKH37-2A                | PA1136              | [ <i>P</i> <sub>lac</sub> - <i>P</i> <sub>a</sub> murA(K22R) gent]                                                                          |                      |
| PAO1/pKH37-4C                | PA1137              | [ <i>P</i> <sub>lac</sub> - <i>P</i> <sub>a</sub> murA(D49V) gent]                                                                          |                      |
| PAO1/pKH37-1A                | PA1138              | [ <i>P</i> <sub>lac</sub> - <i>P</i> <sub>a</sub> murA(G116S) gent]                                                                         |                      |
| PAO1/pKH37-5R                | PA1139 <sup>†</sup> | [ <i>P</i> <sub>lac</sub> - <i>P</i> <sub>a</sub> murA(C117R) gent]                                                                         |                      |
| PAO1/pKH37-5U                | PA1140              | [ <i>P</i> <sub>lac</sub> - <i>P</i> <sub>a</sub> murA(C117S) gent]                                                                         |                      |
| PAO1/pKH37-3D                | PA1141              | [ <i>P</i> <sub>lac</sub> - <i>P</i> <sub>a</sub> murA(I119F) gent]                                                                         |                      |
| PAO1/pKH37-1B                | PA1142              | [ <i>P</i> <sub>lac</sub> - <i>P</i> <sub>a</sub> murA(L126P) gent]                                                                         |                      |
| PAO1/pKH37-1C                | PA1143 <sup>†</sup> | [ <i>P</i> <sub>lac</sub> - <i>P</i> <sub>a</sub> murA(V166A) gent]                                                                         |                      |
| PAO1/pKH37-1E                | PA1144              | [ <i>P</i> <sub>lac</sub> - <i>P</i> <sub>a</sub> murA(E193G) gent]                                                                         |                      |
| PAO1/pKH37-2B                | PA1145              | [ <i>P</i> <sub>lac</sub> - <i>P</i> <sub>a</sub> murA(D234A) gent]                                                                         |                      |
| PAO1/pKH37-4N                | PA1146              | [ <i>P</i> <sub>lac</sub> - <i>P</i> <sub>a</sub> murA(I236T) gent]                                                                         |                      |
| PAO1/pKH37-4L                | PA1147              | [ <i>P</i> <sub>lac</sub> - <i>P</i> <sub>a</sub> murA(T240I) gent]                                                                         |                      |
| PAO1/pKH37-5D                | PA1148              | [ <i>P</i> <sub>lac</sub> - <i>P</i> <sub>a</sub> murA(D308G) gent]                                                                         |                      |
| PAO1/pKH37-1D                | PA1149 <sup>†</sup> | [ <i>P</i> <sub>lac</sub> - <i>P</i> <sub>a</sub> murA(D308N) gent]                                                                         |                      |
| PAO1/pKH37-5N                | PA1150              | [ <i>P</i> <sub>lac</sub> - <i>P</i> <sub>a</sub> murA(Q310R) gent]                                                                         |                      |
| PAO1/pKH37-5L                | PA1151              | [ <i>P</i> <sub>lac</sub> - <i>P</i> <sub>a</sub> murA(E328G) gent]                                                                         |                      |
| PAO1/pKH37-2J                | PA1152              | [ <i>P</i> <sub>lac</sub> - <i>P</i> <sub>a</sub> murA(V330A) gent]                                                                         |                      |
| PAO1/pKH37-2H                | PA1153              | [ <i>P</i> <sub>lac</sub> - <i>P</i> <sub>a</sub> murA(F331L) gent]                                                                         |                      |
| PAO1/pKH37-4J                | PA1154              | [ <i>P</i> <sub>lac</sub> - <i>P</i> <sub>a</sub> murA(R334C) gent]                                                                         |                      |
| PAO1/pKH37-1L                | PA1155              | [ <i>P</i> <sub>lac</sub> - <i>P</i> <sub>a</sub> murA(R334S) gent]                                                                         |                      |
| PAO1/pKH37-3G                | PA1156 <sup>†</sup> | [ <i>P</i> <sub>lac</sub> - <i>P</i> <sub>a</sub> murA(D372G) gent]                                                                         |                      |
| PAO1/pKH37-3C                | PA1157              | [ <i>P</i> <sub>lac</sub> - <i>P</i> <sub>a</sub> murA(A375) gent]                                                                          |                      |
| PAO1/pKH37-4I                | PA1158              | [ <i>P</i> <sub>lac</sub> - <i>P</i> <sub>a</sub> murA(L379P) gent]                                                                         |                      |
| PA1162                       | PA1162              | <i>P</i> <sub>a</sub> murA(C117S) attTn7:: <i>P</i> <sub>TOPLACUV5</sub> - <i>P</i> <sub>a</sub> murA                                       |                      |
| PA1118/pHerd20T              | PA1164              | attTn7:: <i>P</i> <sub>TOPLACUV5</sub> - <i>P</i> <sub>a</sub> murA [ <i>P</i> <sub>ara</sub> -empty amp]                                   |                      |
| PA1162/pHerd20T              | PA1167              | <i>P</i> <sub>a</sub> murA(C117S) attTn7:: <i>P</i> <sub>TOPLACUV5</sub> - <i>P</i> <sub>a</sub> murA [ <i>P</i> <sub>ara</sub> -empty amp] |                      |
| PA1118/pKH269                | PA1242              | attTn7:: <i>P</i> <sub>TOPLACUV5</sub> - <i>P</i> <sub>a</sub> murA [ <i>P</i> <sub>ara</sub> - <i>P</i> <sub>a</sub> murA(G58D) amp]       |                      |

|               |        |                                                                                                                                                      |
|---------------|--------|------------------------------------------------------------------------------------------------------------------------------------------------------|
| PA1162/pKH269 | PA1243 | <i>P<sub>a</sub>murA(C117S)</i> <i>attTn7::P<sub>TOPLACUV5</sub>-P<sub>a</sub>murA</i> [ <i>P<sub>ara</sub>-P<sub>a</sub>murA(G58D)</i> <i>amp</i> ] |
|---------------|--------|------------------------------------------------------------------------------------------------------------------------------------------------------|

<sup>a</sup> Brackets indicate genetic material encoded by a plasmid.

<sup>†</sup>The indicated strain also contains a silent mutation in the plasmid-encoded *murA* open reading frame. See Table S2 for details.

**Supplementary Table 4 - Primers used in this study**

| Primer | Sequence                                                                     |
|--------|------------------------------------------------------------------------------|
| 15     | ACTGTTGGGAAGGGCGATCAAA                                                       |
| 67     | CACAGCATAACTGGACTGATTC                                                       |
| 68     | GCACATCGGCGACGTGCTCTC                                                        |
| 76     | ACACTTTATGCTTCCGGCTC                                                         |
| K5     | AGGAGGAATTCTCGGCTACGATCAATACCG                                               |
| K6     | CGATGGGAGGGGTGTTCTCCAGCCACAGAATCAGATTCTT                                     |
| K7     | AAGAATCTGATTCTGTGGCTGGAGAACACCCCTCCCATCG                                     |
| K8     | AGGAGTCTAGAGCCGAGCTTGAGAACGAAG                                               |
| K9     | AGGAGGAATTCCCGTTCTGAAGGTCGCAAG                                               |
| K10    | CATGGCTTTGGCCGCTTAAG                                                         |
| K11    | TTAAGCGGCCAAAGCCATGCATCATCACCATCACCACATCAAACAACGCACCTTGAAG                   |
| K12    | AGGAGTCTAGAGCCGGGCGCATATAGGAAA                                               |
| K15    | AGGAGAAGCTTGCCTCCAAATATGGAAAGGA                                              |
| K17    | TGACCTCCTTGACGAAGGAA                                                         |
| K21    | GTCCAGCCGGTCGTAACG                                                           |
| K24    | AGGAGGAATTCAGGAGGAATACACCATGCATCATCACCATCACCACATCAAACAAGGACACTT<br>AAACGTAT  |
| K25    | AGGAGAAGCTTTGTCGTTATGCCAGTACAGC                                              |
| K27    | AGGAGGAATTCAGGAGGAATACACCATGCATCATCACCATCACCACATCAAACAACGCACCTTG<br>AAG      |
| K54    | AGGAGGGTACCTTAAGCGGCCAAAGCCATG                                               |
| K55    | AGGAGGCATGCGCCTCCAAATATGGAAAGGA                                              |
| K78    | AGGAGAAGCTTCCATCCTGGCCGAGGAACA                                               |
| K79    | GCGAATGCCGTCGACCAGGGCGATCAGGGTCTGGCT                                         |
| K80    | AGCCAGACCCTGATCGCCCTGGTCGACGGCATTGCG                                         |
| K81    | AGGAGGGATCCTTCCTTGAGCTGCCTGGTC                                               |
| K98    | AGGAGCCCGGGCACGGGGGATCATTGCAAT                                               |
| K100   | GACCGGCGATCCGGCAAAT                                                          |
| K106   | TTCATGGAGATGAACTGGGC                                                         |
| K108   | GATCGCGCTACCGCCCGG                                                           |
| K109   | CCGGGCGGTAGCGCGATC                                                           |
| K112   | AGGAGGCATGCACAGCCTCCGCTAGCCCG                                                |
| K148   | AGGAGCCCGGGACGGGAGGAAAGATGGACTACAAAGACGACGATGATAAGGATAAACTGATTA<br>TTACCGGCG |
| K149   | AGGAGAAGCTTACAGCCTCCGCTAGCCCG                                                |
| K166   | AGGAGGAATTCTACGACAACCAGGACATCCG                                              |
| K167   | ACCGCCGGTAATAATCAGTT                                                         |
| K168   | AACTGATTATTACCGGCGGTAAGATCCGCCGCGTACCGG                                      |
| K169   | AGGAGTCTAGATGGAGACCGTCGAAGCGCT                                               |
| K170   | AGGAGGAATTCGATGCCATCGTGGTCAACGT                                              |
| K171   | TTGCAGTTCCAGGCTCACAG                                                         |
| K172   | CTGTGAGCCTGGAAGTCAACCTGAACCAATCTCTACTGAGGG                                   |
| K173   | AGGAGTCTAGAGGCAGCGAGGCGACCGATAA                                              |
| K174   | AGGAGGGATCCACGGGAGGAAAGAATGGATAAACTGATTATTACCGGCG                            |
| K175   | AGGAGGGATCCACGGGAGGAAAGATGAGCCTGGAAGTCAAGAG                                  |
| K176   | AGGAGGCATGCCGCACCCTCAGTAGAGATTGG                                             |
| K177   | GGATGACCCCCCAGGGCCTTGAA                                                      |
| K178   | GCCCGGGTGACTGCAGGAAG                                                         |
| K179   | TTCAAGGCCCTGGGGGGTTCATCCATGATCAAACAACGCACCTTGA                               |
| K180   | CTTCCTGCAGTCACCCGGGCTACACTGCCGCCGCCGG                                        |
| K183   | GGTATATCTCCTTCTTAAAGTTAAACAA                                                 |
| K184   | GAATTCGAGCTCCGTCGACA                                                         |
| K187   | AAGCGTCAGCAGCAGGTCTA                                                         |
| K188   | GAGGATTTCTCCCGCCATGA                                                         |

|      |                                                                              |
|------|------------------------------------------------------------------------------|
| K193 | TTGTTTAACTTTAAGAAGGAGATATACCATGCATCATCACCATCACCACGATAAACTGATTATTAC<br>CGGCGG |
| K194 | TGTCGACGGAGCTCGAATTCTTAGCCCGGTACGCGGCGG                                      |
| K202 | TTCAAGGCCCTGGGGGGTTCATCCATGATCAAACAAAGGACACTTAAA                             |
| K203 | CTTCCTGCAGTCACCCGGGCTTATGCCAGTACAGCTGAAGG                                    |
| K204 | TTGTTTAACTTTAAGAAGGAGATATACCATGCATCATCACCATCACCACGATAAATTTTCGTGTTCA<br>GGGG  |
| K205 | TGTCGACGGAGCTCGAATTCTTATTCGCCTTTTACACGCTC                                    |
| K218 | AGGAGGGATCCCATTGACGAACTTGGTGGCC                                              |
| K223 | TTCAAGGCCCTGGGGGGTTCATCCGTGAAACAGCGTACTCTCAAT                                |
| K224 | CTTCCTGCAGTCACCCGGGCTTATGTCACACTCACGTATGGA                                   |
| K225 | TTGTTTAACTTTAAGAAGGAGATATACCATGCATCATCACCATCACCACGATAAATTTTAAATCAC<br>GGGCG  |
| K226 | TGTCGACGGAGCTCGAATTCTTAACTTACTCGCTTAATTTTGG                                  |
| K238 | CCAAAATTAAGCGAGTAAGTTAAGAATTTCGAGCTCCGTGACA                                  |
| K239 | TGTCGACGGAGCTCGAATTCTTAACTTACTCGCTTAATTTTGG                                  |
| K284 | CGCATTTCCGGCGCGCGCAACTCGGCGCTGCCG                                            |
| K285 | CGGCAGCGCCGAGTTGCGCGCGCCGGAAATGCG                                            |
| K286 | CCTGCCGGGCGGTCGCGCGATCGGTTC                                                  |
| K287 | GAACCGATCGCGCGACCGCCCGGCAGG                                                  |
| K288 | GGCGGTTGCGCGTTTGGTTGCGGTCCG                                                  |
| K289 | CGGACGCGAACCACGCGCAACCGCC                                                    |
| K290 | GCGTTCCCCACCAACATGCAGGCC                                                     |
| K291 | GGGCCTGCATGTTGGTGGGGAACGC                                                    |
| K292 | TTCCCCACCGACATGCGCGCCAGTTCATCTCC                                             |
| K293 | GGAGATGAACTGGGCGCGCATGTCGGTGGGGAA                                            |
| K294 | GACGGTCTTCGAGAACTGCTTCATGCATGTTTAC                                           |
| K295 | GTAAACATGCATGAAGCAGTTCTCGAAGACCGTC                                           |
| K296 | GACGGTCTTCGAGAACAGCTTCATGCATGTTTAC                                           |
| K297 | GTAAACATGCATGAAGCTGTTCTCGAAGACCGTC                                           |
| K379 | GATCGAACTGTTTCGACCGCATGGGCGTGC                                               |
| K380 | GCACGCCCATGCGGTCTGAACAGTTTCGATC                                              |
| K381 | GTGGCTACGAGTGCATCAAGGAGAACTCCAGCTGC                                          |
| K382 | GCAGCTGGAGTTTCTCCTTGATGCACTCGTAGCCAC                                         |

**Supplementary Table 5 – gBlock sequences used in this study**

| gBlock           | Sequence <sup>a</sup>                                                                                                                                                                                                                                                                                                                                                                                                                                                                                                                                                                                                                                                                                                                                                                                                                                                                                                                                                                                                                                                                                                                |
|------------------|--------------------------------------------------------------------------------------------------------------------------------------------------------------------------------------------------------------------------------------------------------------------------------------------------------------------------------------------------------------------------------------------------------------------------------------------------------------------------------------------------------------------------------------------------------------------------------------------------------------------------------------------------------------------------------------------------------------------------------------------------------------------------------------------------------------------------------------------------------------------------------------------------------------------------------------------------------------------------------------------------------------------------------------------------------------------------------------------------------------------------------------|
| <i>MkuI</i> pxC  | TTCAAGGCCCTGGGGGGTTCATCC <u>CCCC</u> GGATCCAATGCGCCGAGTCTGGCGTCGGAAGCCAG<br>TGCAGTGCGCTCCCGTACCCTGAAAACCTTCGATCGGTTGTACGGGGGTGGGACTTCATTAG<br>GTGCCAAAGTTACGATGGTCCTGCATCCGGCCGAGCCTGGAACGGGGATTGCTTCCGCCGT<br>GTGGATATTAACGGTGGCGGAGCTATCGTTCTGCAATCTGGTCGGCTGTACATGATACTCGT<br>ATGAACAGCTGCCTGAAAACGACGATGGTATCGTAGTAGGCACCGTAGAGCATCTGATGTC<br>GGCGTTGGCTGGGATGCAGATTGATAACTGTTTGATCGACATCAATGGTCCTGAAGTCCCTGT<br>AATGGATGGATCTGCTGCGCCGTTCTTTTTTAATTGAGTGCGCAGGCGTGGTTCGAACAGTC<br>TGCTCCACGCCAAGCCATTAAAGTTTTAAAGCGCGTCTCAGTGAAGGATGGCGATCGCGTAG<br>CGTCGTTAACCCCAAGCTCTGGCTTTTCGATCCGCTTTGAAATTGACTTTGGGGCATCTGCTA<br>TCAGTCGTCAAGAGTTTTTCGTGAATCTGAGCCGCGGCACTTTCAAAGCGAAATTAGTCGCG<br>CGCGCACCTTCGGTTTTGAACAAGAGGTGGCTTTTCTGCGTGCAAAATGGTCTTGCTCGTGGG<br>GGTAGCTTGATAACGCAGTCGTCAATTGACTCAACGGGAACGCGCGTCCTTAACGATGAGGG<br>CCTGCGTTATACCGACGAGTTCTGTGCGTCACAAAGTCCTGGACGCGGTTGGAGATTTATATT<br>AGCTGGAGCCCCCTTGATTGGTCATTTTCATGGGATTTCGTTGCGGCCATGCCTTAAATAATCA<br>GTTACTTCGCGCTTTATTTGCCGATCAGACGGCATGGACACTGACGACCGTGGCCCCAGGTT<br>CTGCCGCGGCACCTTTCGCAGCTGAACCTCAACGTGCCGCTTTAAGTGCGT <b>TAAG</b> CCCCGGGTG<br>ACTGCAGGAAG |
| <i>XbaI</i> pxC  | TTCAAGGCCCTGGGGGGTTCATCC <u>CT</u> GAAAGCAGCGCACATTGAAGAACTCGATCCGCGCGACT<br>GGAGTTGGTCTTCATACTGGGAAGAAGGTCTTGATGGTATTACGTCCCGCCCCAGCAGACAC<br>GGGGATTGTGTTTCAACGTACCGACTTGACGAGCCTGTGGATATCCCGCCCCGCGCGGGTA<br>ACGTCACCGAGACCACACTGGGCACACACTGACTGTTGGCGAGGCTCGCGTCTCGACTGTC<br>GAGCACCTTATGAGTGCAATTAGCTGGCCTGGGTATTGACAACTTATATGTTGAACCTTCTGCG<br>GGGGAGGTCCCGATTATGGACGGCTCAGCAGGGCCATTCTGCTTCTTACTGCAAAGCGCTGG<br>CATCGAGGAGCAGAATGCGCCGAAACGTTTTGTTGCGCATCAAGAAAAGCGTCAAAGTCGAGG<br>ACGGAGATAAATGGGCTCGTTTTGATCCTTACGACGGGTTCAAAGTAACTTCGAAATTGAGT<br>TCGATCATCCAGTCTTTAAGCGCCGCTCGCAGGTTGCGTCAATGGACTTTAGTACCACTACCT<br>TTTTGCGTGAGGTGAGTCGTGCCCCGACCTTTGGATTTATGCGCGACCTTGAATACATGCGTT<br>CTCGCAATCTGGCATTGGGGGGCAATCTGGATAACGCCATTGTACTTGACGATTACCGTGTAC<br>TGAACGAAGACGGGCTGCGCTACGAAGATGAATTTGTCAAGCACAAAATCTTGGATGCTATTG<br>GTGACTTGATCTTCTTGGTCATTGCTGATTGGGGAGTTCTCTGTTATAAGTCAGGGCATG<br>GTCTTAATAATCGTTTGTTACGTACCTTGTTGCGGACGCTTCAGCCTGGGAAGAAGTCACTT<br>TTGAAACGCTGCAAGATGCACCAATTAGCTACGTGGCTGCTGCTGCTGCCACCGCGT <b>TAAG</b> CC<br>CGGGTGACTGCAGGAAG                                                              |
| <i>LpnI</i> pxC  | TTCAAGGCCCTGGGGGGTTCATCC <u>ATCA</u> AGCAGCGTACACCCAAAAAGGTTCATCCAGGCGACG<br>GGTGTGGTTTACATAGCGGGGAAAAGGTTCTTCTTACTCTGCGTCCAGCCCCGTCAACACT<br>GGCATTGTTTTCCGCCGCGTGATCTTTCGCCAGTGGTAGAAATCCAGCATCTTACGAGTAT<br>GTAGGTGATACTATGTTGTGTACCACCCTGCATCACGAAAAAGTTAAAATCGCGACAGTAGAA<br>CACCTGCTGTCTGCACTGGCAGGGTTGGGAATTGACAACGCCTACATTGATGTGAACGCCCC<br>CGAGATTCCGATTATGGACGGTAGTGCGGCACCATTCGATTTCTGATTCAATCAGCAGGTAT<br>TCGCGAACAGAACGCGGCTAAGCGTTATATTCGCATCTTAAAGCCGATTCTGTGTTGAAGAAAA<br>CGGAAAATATGTACAATTTTTACCCCAAGGGGTATAAGATTACTTTACCATTTGGGTTTCGAG<br>CACCCAGTGTTTAAATGATCGCCCGCAGACAGTGAGCTTCGACTTTTCCGGTACTTCTTATGTG<br>AAGGAAGTCTGCCGTGCCCGCACCTTTGGTTTCTTGTCTGACTACGAAAAGCTTCGTGAATGT<br>GATTTGGCAAAGGGGGGATCACTTGACAACGCGATTGTCTGATAGTACTACCGCGTATTGAAT<br>GAGGACGGAATTACGCTTCGAGTCTGAGTTTCGTAACCCATAAAGTACTTGACGCAATCGGGGAT<br>TTGTACTTATTAGGCAGCAGTTTGATCGGGGCGTTTCGAGGATACAAGTCAGGGGCACGAGCT<br>GAACAATCGCCTGCTGCGCGAATTGATGGTTTCGTCAAGATGCGTGGAATATACCTACTTCGA<br>TACAGAGAATTACTTACCCGCTGTACATCCCGAATATTATCCTGTGGAAGCC <b>TAAG</b> CCCCGGT<br>GACTGCAGGAAG                                                           |
| <i>MkuI</i> murA | TTGTTTAACCTTTAAGAAGGAGATATACCATGCATCATCACCATCACCACGATCGTATTTCGTATC<br>ATTGGAGGCACGCCCTTAAAGGCACAATTACGATCGGTGGCGCTAAGAACGCTGCCCTTGC<br>CTTGATGCCAGCGTGTTTGTTGACTGACGAACTTTGTCTCTTGCAAACCTTCCCCACCTGGT<br>AGACATCACTACAATGGCGAACCTTCTGGCACAACATGGAGTCGGAATGATTCTGAATGGAGA                                                                                                                                                                                                                                                                                                                                                                                                                                                                                                                                                                                                                                                                                                                                                                                                                                                             |

|                        |                                                                                                                                                                                                                                                                                                                                                                                                                                                                                                                                                                                                                                                                                                                                                                                                                                                                                                                                                                                                                                                                                                                                                                                                                                                                                                                                                                                                                                                                                                                       |
|------------------------|-----------------------------------------------------------------------------------------------------------------------------------------------------------------------------------------------------------------------------------------------------------------------------------------------------------------------------------------------------------------------------------------------------------------------------------------------------------------------------------------------------------------------------------------------------------------------------------------------------------------------------------------------------------------------------------------------------------------------------------------------------------------------------------------------------------------------------------------------------------------------------------------------------------------------------------------------------------------------------------------------------------------------------------------------------------------------------------------------------------------------------------------------------------------------------------------------------------------------------------------------------------------------------------------------------------------------------------------------------------------------------------------------------------------------------------------------------------------------------------------------------------------------|
|                        | <p>CGCGGCGAATGGCGGACATACCGGCCGCGTGCTTGAGTTGACTGCCGCGGAAATCACGAAT<br/> ACTACTGCCCCGATGATCTGGTGCGTAAGATGCGTGCCCTCGGTCCTTGCTTGGGTCCCCTT<br/> TTGGCTCGCTGTGGACAGGCGCGCTTTCTTTGCCTGGCGGGTGTGCAATCGGAACTCGCCC<br/> CGTTGACTTGCACCTGAAAGCGTTGGAACAAATGGGTGCAGTGATCGAGCTGGAGGAAGGCT<br/> ACATCGTAGCGCACGTTTCGTGGCCGCTTGAAGGGAGCACATATTATTTTCCCCCAGGTAACC<br/> GTCGGCGGGACGGAGAACATCTTGATGGCCGCTTCACTGGCTGAGGGGGAAACCGTAATCG<br/> CTAACGCCGCTCGTGAGCCAGAGGTCGCGGATTTGCCCCACTGCTTGGTAGCTATGGGGGC<br/> TAAATTGAGGGCATTGGAAGCGGAACCTTGACATCCAAGGTGTGGACCGCTTGCATGGGG<br/> CTCATTACTCGGTTGTGCCTGACCGCATTGAGACTGGGTCTTATGCTGTAGCAGCCGCGATC<br/> ACCCGCGGAGACATCGAATTGGTTGGGGCACGCTTTGACCTTATGGAGTCGGTAAACACGAT<br/> CTTAACCGAGTGCGGAGTACTGGTGGAGGAAACGCCGCGCGGGATGCGCGTCTGCGCTGAG<br/> GGCCGCGATATTGCGGGGGTGGACATTATGACAGAACCCTATCCCGGTTTCCCTACCGATAT<br/> GCAGGCTCAGCTTATGGCACTGATGTCCACTTCATCGGGAGCCTCCATGATTACCGAGACAAT<br/> TTTTGAAAATCGCTTTATGCACGTTTCTGAAATGACGCGCATGGGAGCGCGTATCAACGTACA<br/> TGCGCTTCAGCTATTGTACGTGGATCGGCGAAATTATCAGGCGCACAAAGTAATGGCCACCG<br/> ACTTACGCGCTCCGTTTCGTTAATCTTGCCCGGACTTGTCTGCTGAAGGCGAAACAATCGTAA<br/> ATCGCGTGTACCACCTTGACCGTGGATACGAACGTGTAGAGGAGAAGTTAGCGGCGTGTGGA<br/> GCGCGTATCGAGCGTTTAAAGCGCAGCGCTGCCGAGTAAGAATTTCAGACTCCGCTCGACA</p>                                                                                                                                                                                                                                                 |
| <i>Xba</i> <i>murA</i> | <p>TTGTTTAACTTTAAGAAGGAGATATACCATGCATCATCACCATCACCACGATAAACTGATCATT<br/> ACAGGTGGTGTGCCTTTAAATGGAGAAATTCGCATCTCAGGTGCTAAGAATGCGGCGCTGCC<br/> GATCTTGGCCGCCACATTGCTTAGCGATTGCGCAATGACAGTGGGTAACATTCCACATCTGCA<br/> CGACGTTACTACGACTATGGAACTTTTAGGCCGTATGGGTGTGCAACTTGTAGTTGACGAGAC<br/> TATGAACATTGAAGTTGATGCAAGTTCCATTCTGTGAATTTACGCCCCATACGAACCTGGTCAAA<br/> ACAATGCGTGCCTCTATTTTGGTTCTGGGCCCACTGCTTGCTCGCCATGGGGAAGCCTTGGTT<br/> TCATTGCCGGGAGGATGCGCCATTGGCTCGCGTCCGGTTAACCTGCACATTCACGGCCTGGC<br/> GAAGATGGGTGCTGACATCCATGTTGAGAACGGGTTTATCCGCGCCCGTGCAAAACGTTTAAA<br/> AGGCACACGTCTGGTTATGGACTTGGTAACGGTGACGGGCACTGAAAATTTGATGATGGCGG<br/> CAACCCTGGCAAAGGGAACAACAGTGATTGAGAACGCTGCTCGTGAGCCTGAGGTTGTTGAT<br/> CTTGCGAATTGTTTGATCGCAATGGGGGCTAGCATTGATGGAGCGGGGACCGATAACAATCAC<br/> CATCGATGGAGTCGACTCGCTTTCTGGTACACACTATAATGTACTTCCGGACCGCATCGAATC<br/> TGGCACGTTCCCTTGTGCGCGCAGCAATTACTGGTGGTAACGTGAAGATTAAAGACACTCGTCC<br/> TGCAATGTTGGAAGCCATCCTGGAGAACTTGAAGAGGTGGGAGCGGAGTTGGAATCGGCG<br/> ATGATTGGATTCTGTTTGAATATGCACGGACGCCGCCCTAAAGCCGTTAGCGTTCGCACAAGTC<br/> CGTACCCCGCCTTCCCGACTGACATGCAAGCTCAATTCACGGCACTTAACGCTGTAGCTGAC<br/> GGGACTGGTGTAATTCTTGAAACTGTATTTGAGAATCGTTTTATGCATGTACACGAGCTGCAG<br/> CGCATGGGTGCCAATATTCGTTTGGAGGGAAACACAGCAGTGACCCAGGGTGTCAAAAACT<br/> GACTGCAGCGCCCGTGATGGCAACTGATCTGCGCGCTTCAGCCTCTCTTGTGTTTGGCAGGAC<br/> TGGTGGCAGAAGGGGACACAGTAGTAGATCGCATTTACCATATCGATCGCGGTTATGAGGGC<br/> ATTGAAGAAAACTGGCCCGTTAGGAGCGCGTATCCGTCGTGTTCCCGGATTAAGAATTCTGA<br/> GCTCCGTCGACA</p> |
| <i>Lpn</i> <i>murA</i> | <p>TTGTTTAACTTTAAGAAGGAGATATACCATGCATCATCACCATCACCACGATAAACTACTGATC<br/> AATGGTGGTAAAGCTCTTCATGGTGAGGTAGTCATTAGTGGAGCAAAAAATGCGGCTTTACCC<br/> ATTATGGCTGCCTCTTTGTTGGCTAGTGACCACGTAACCTATTTGCAATGTTCCCCACCTTAAGG<br/> ATATTACAACCATGATGGAACCTGTTAGGTCAGCTTGGCGCGCACTTAATCGTGGATGAGAAAA<br/> TGAATGTCCAGGTAGATTCATCGCAGGTGAACGAGTTTGTGGCCCCCTATGATCTTGTCAAGA<br/> CGATGCGTGCGTCAATCTTAGTCTTGGGGCCTATGCTGGCCCCGCTTTGGAAAGGCCGACGTA<br/> AGCCTGCCCGGTGGGTGCGCCATTGGAACACGCCCGCTCGACCTGCACTTAAAGGCCCTTC<br/> GTGCTATGGGCGCGGACATCACAGTCAAGAACGGATACATCAACGCACGTTGTAAAAAGGGC<br/> TGCCTGCAAGGCAAACGTTTAAATGTTTGATACCGTAACTGTGACGGGAACAGAAAACGTGTTG<br/> ATGGCTGCAGTCCTGGCTGAGGGAATTACTACCATCAAGAATGCAGCCCGTGAGCCTGAAGT<br/> CGTGGATCTGGCTAACTTCCTTATCCAAATGGGTGCAAAAATTCGCGGCGCAGGTACTTCCAC<br/> TATTGAGGTGGAAGGGGTTGAGTCGCTGAACGGAGGGACATACTCCGTCATGTCCGATCGTA<br/> TCGAGGCTGGAACATATTTGGCAGCCGGTGCAATTGACGCGCGGCCAGGTAACGTGTTAAAAA<br/> GTCCGTCAGACACATTGTTATCGCAACTTTGCAAGTTTGAAGGAGCGGGAGCCGAATTGACA<br/> ATCGGGGAAGACTGGGTGAGTCTTAATATGCACAATAAACGCCCGCAGGCTGTAAATATTTCA<br/> ACTGCCCGTATCCTGCCTTCGCTACGGATATGCAAGCCCAATTCATGGCTATGAACAGTGTT</p>                                                                                                                                                                                                                                                                                                                                                                       |



|  |                                                                                                                                                                                                                                                                                                                                                                           |
|--|---------------------------------------------------------------------------------------------------------------------------------------------------------------------------------------------------------------------------------------------------------------------------------------------------------------------------------------------------------------------------|
|  | GCTGAGGGGTCTTCCACTATTATCGAGACTATTTTTGAAAACCGCTTTATGCATGTGCAAGAGT<br>TACAGCGCATGGGGGCCAACATTCAGCTGAATGGAAACACAGCAATTGTTTCATGGAGTAGAAA<br>AGTTAACTGGCGCTCCTGTTATGGCTACTGACCTTCGTGCCTCTGCCAGTCTGATTTTGGCTG<br>GATTAGTCGCAGAAGGTGAGACAGTTGTGGAACGTATCTACCACGTAGATCGTGGGTACGAA<br>CGCATCGAAGAGAAAATTATCTCTTCTTGGTGCCGATATTAAGCGCGTGAGTGACCGT <b>TAAGAA</b><br>TTCGAGCTCCGTGACA |
|--|---------------------------------------------------------------------------------------------------------------------------------------------------------------------------------------------------------------------------------------------------------------------------------------------------------------------------------------------------------------------------|

<sup>a</sup> The first codon of the open reading frame is underlined and the stop codon is indicated in bold.

## SUPPLEMENTARY REFERENCES:

- 1 Miller, J. Experiments in molecular genetics. *Cold Spring Harbor Laboratory, Cold Spring Harbor, N.Y.* (1972).
- 2 Meeske, A. J. *et al.* SEDS proteins are a widespread family of bacterial cell wall polymerases. *Nature* **537**, 634-638, doi:10.1038/nature19331 (2016).
- 3 Rietsch, A., Vallet-Gely, I., Dove, S. L. & Mekalanos, J. J. ExsE, a secreted regulator of type III secretion genes in *Pseudomonas aeruginosa*. *Proc Natl Acad Sci U S A* **102**, 8006-8011, doi:10.1073/pnas.0503005102 (2005).
- 4 Hoang, T. T., Karakhoff-Schweizer, R. R., Kutchma, A. J. & Schweizer, H. P. A broad-host-range Flp-*FRT* recombination system for site-specific excision of chromosomally-located DNA sequences: application for isolation of unmarked *Pseudomonas aeruginosa* mutants. *Gene* **212**, 77-86 (1998).
- 5 Qiu, D., Damron, F. H., Mima, T., Schweizer, H. P. & Yu, H. D. PBAD-based shuttle vectors for functional analysis of toxic and highly regulated genes in *Pseudomonas* and *Burkholderia* spp. and other bacteria. *Appl Environ Microbiol* **74**, 7422-7426, doi:10.1128/AEM.01369-08 (2008).
- 6 Marmont, L. S. & Bernhardt, T. G. A conserved subcomplex within the bacterial cytokinetic ring activates cell wall synthesis by the FtsW-FtsI synthase. *Proc Natl Acad Sci U S A* **117**, 23879-23885, doi:10.1073/pnas.2004598117 (2020).
- 7 Fivenson, E. M. & Bernhardt, T. G. An Essential Membrane Protein Modulates the Proteolysis of LpxC to Control Lipopolysaccharide Synthesis in *Escherichia coli*. *mBio* **11**, e00939-00920, doi:10.1128/mBio.00939-20 (2020).
- 8 Vvedenskaya, I. O. *et al.* Growth phase-dependent control of transcription start site selection and gene expression by nanoRNAs. *Genes Dev* **26**, 1498-1507, doi:10.1101/gad.192732.112 (2012).
- 9 Choi, K. H. *et al.* A Tn7-based broad-range bacterial cloning and expression system. *Nat Methods* **2**, 443-448, doi:10.1038/nmeth765 (2005).
- 10 Greener, A. & CaUahan, M. XL1-RED: a highly efficient random mutagenesis strain. *Strategies* **7**, 32-34 (1994).
